# Supplementary material
Source: PubMed Central journal article supplement (PMC9535537)
Supplement: jamacardiol-e223305-s001.pdf [file jamacardiol-e223305-s001.pdf]

## Supplemental Online Content

Solomon MD, Leong T, Sung SH, et al; the Kaiser Permanente Northern California Center for Thoracic Aortic Disease. Association of thoracic aortic aneurysm size with long-term patient outcomes: the KP TAA study. *JAMA Cardiol*. Published online October 5, 2022.  
doi:10.1001/jamacardio.2022.3305

**eTable 1.** ICD-9 And ICD-10 Codes Used To Identify Syndromic Patients For Exclusion

### **eMethods**

**eFigure 1.** Cohort Assembly

**eTable 2.** Additional Baseline Characteristics for Patients with Thoracic Aortic Aneurysm

**eFigure 2.** Cumulative Incidence of Aortic Dissection, All-Cause Mortality, and Elective Aortic Surgery, by Initial TAA size

**eTable 3.** Surgery among bicuspid aortic valve patients

**eTable 4.** Model Discrimination Parameters (C-statistics) for Models Using Aortic Size vs Aortic Size Index

**eTable 5.** Multivariable Association of Initial Aortic Size Index (ASI) and Most Recent ASI Prior to Outcome with Clinical Outcomes

This supplemental material has been provided by the authors to give readers additional information about their work.

**eTable 1. ICD-9 And ICD-10 Codes Used To Identify Syndromic Patients For Exclusion**

|       |         |                                                  |
|-------|---------|--------------------------------------------------|
| ICD9  | 759.82  | MARFANS SYNDROME                                 |
| ICD10 | Q87.4   | MARFANS SYNDROME                                 |
| ICD10 | Q87.40  | MARFANS SYNDROME UNSPECIFIED                     |
| ICD10 | Q87.41  | MARFANS SYNDROME W/CV MANIFESTATIONS             |
| ICD10 | Q87.410 | MARFANS SYNDROME WITH AORTIC DILATION            |
| ICD10 | Q87.418 | MARFANS SYNDROME W/OTH CV MANIFESTATIONS         |
| ICD10 | Q87.42  | MARFANS SYNDROME WITH OCULAR MANIFESTATIONS      |
| ICD10 | Q87.43  | MARFANS SYNDROME WITH SKELETAL MANIFESTATION     |
| ICD10 | Q79.6   | EHLERS DANLOS SYNDROME                           |
| ICD9  | 758.6   | TURNER SYNDROME                                  |
| ICD10 | Q96     | TURNER SYNDROME                                  |
| ICD10 | Q96.0   | KARYOTYPE 45 X                                   |
| ICD10 | Q96.1   | KARYOTYPE 46 X ISO XQ                            |
| ICD10 | Q96.2   | KARYOTYPE 46 X W/ABNORMAL SEX CHROMOSOME NO ISO  |
| ICD10 | Q96.3   | MOSAICISM 45 X/46 XX OR XY                       |
| ICD10 | Q96.4   | MOSAICISM 45 X/OTH CELL LINES W/ABN SEX CHROMOSM |
| ICD10 | Q96.8   | OTHER VARIANTS OF TURNERS SYNDROME               |
| ICD10 | Q96.9   | TURNERS SYNDROME UNSPECIFIED                     |
| ICD10 | Q87.89  | LOEYS DIETZ SYNDROME                             |

Note: We excluded all patients with known predisposition to TAA, whom we identified using a combination of manual review of health plan databases, including registries from cardiovascular genetics clinics, in combination with searches of relevant ICD-9/10 codes included in eTable1.

## **eMethods**

### *Covariates*

We used health plan administrative and clinical data, pharmacy databases, and laboratory databases from our comprehensive KPNC EHR to obtain baseline demographics, medications, laboratory values, and vital signs for our study population. Race and ethnicity are self-reported in our data. Race refers to the categories of: African American/Black, Asian/Pacific Islander, White, Other, and Unknown. "Other" for race refers to any self-identification not listed previously, which may include Native American, a subset of Latino/a individuals who do not identify as one of the previously defined races, and multiracial. "Unknown" indicates missing race or ethnicity. Ethnicity is dichotomized as Hispanic vs. not-Hispanic.

Using validated algorithms,<sup>17-21</sup> we identified multiple comorbid conditions before the index date acute myocardial infarction (AMI); unstable angina; ischemic stroke or transient ischemic attack; peripheral artery disease; mitral or aortic valve disease; atrial fibrillation; heart failure; coronary artery bypass surgery (CABG); percutaneous coronary intervention (PCI); hypertension; dyslipidemia; hospitalized bleed; liver disease; lung disease; thyroid disease; depression; cognitive impairment/dementia; diabetes mellitus; and history of abdominal aortic aneurysm.

Using pharmacy databases, we also identified receipt of relevant medications before the index date including angiotensin converting enzyme inhibitors, angiotensin II receptor blockers, beta blockers, calcium channel blockers, diuretics, aldosterone receptor antagonists, hydralazine, vasodilators, alpha blockers, other hypertension medications, nitrates, statins, other lipid-lowering agents, non-aspirin antiplatelet agents, anticoagulants, digoxin, antiarrhythmic agents, diabetes therapies, and non-steroidal anti-inflammatory drugs (NSAIDs).

**eFigure 1. Cohort Assembly**

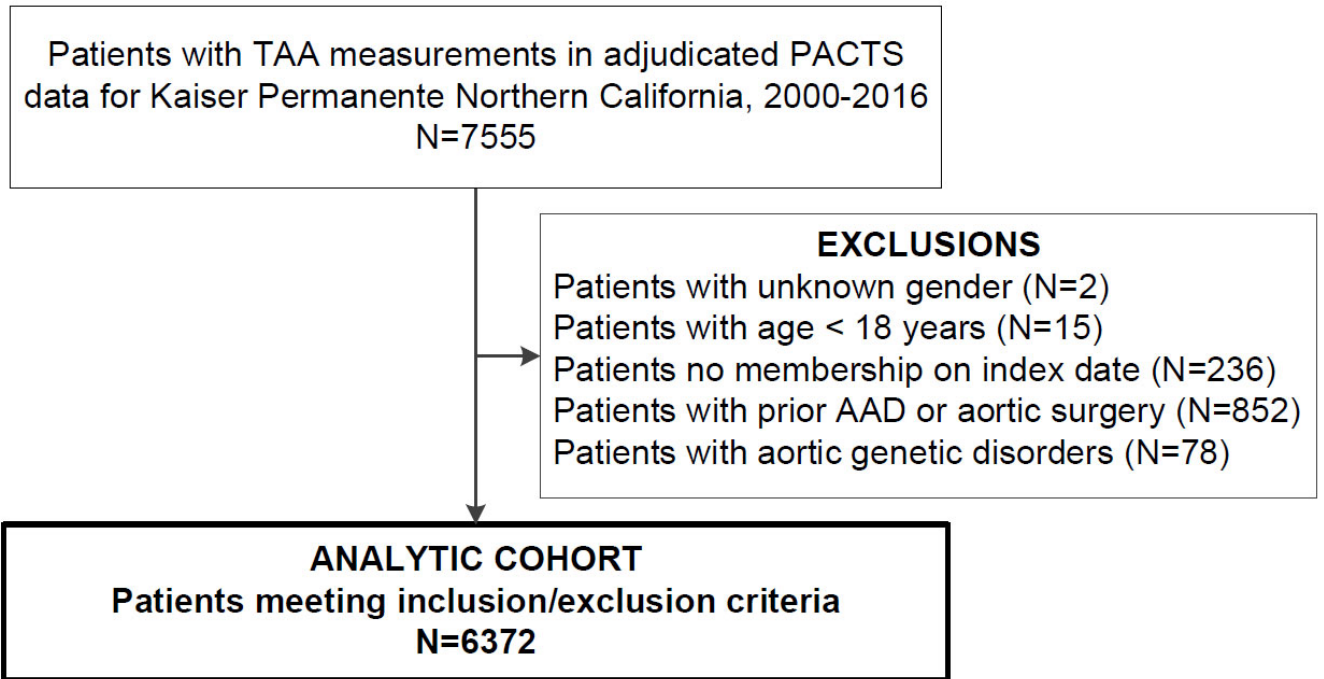

**eTable 2. Additional Baseline Characteristics for Patients with Thoracic Aortic Aneurysm**

|                                             | Overall<br>(N=6372) | 3.5-3.9 cm<br>(N=726) | 4.0-4.4 cm<br>(N=3120) | 4.5-4.9 cm<br>(N=1698) | 5.0-5.4 cm<br>(N=548) | 5.5-5.9 cm<br>(N=156) | Over 6.0 cm<br>(N=124) | P                |
|---------------------------------------------|---------------------|-----------------------|------------------------|------------------------|-----------------------|-----------------------|------------------------|------------------|
| <b>Demographics</b>                         |                     |                       |                        |                        |                       |                       |                        |                  |
| Median (IQR) age, yr                        | 69.2 (60.4-77.9)    | 68.8 (59.8-77.7)      | 68.8 (60.5-77.1)       | 69.6 (60.6-78.2)       | 69.9 (60.5-78.8)      | 68.2 (58.3-79.9)      | 76.8 (61.8-83.8)       | <b>&lt;0.01</b>  |
| Age category, yr                            |                     |                       |                        |                        |                       |                       |                        | <b>&lt;0.001</b> |
| Age 21-49                                   | 498 (7.8)           | 69 (9.5)              | 231 (7.4)              | 127 (7.5)              | 45 (8.2)              | 12 (7.7)              | 14 (11.3)              |                  |
| Age 50-64                                   | 1797 (28.2)         | 192 (26.4)            | 919 (29.5)             | 463 (27.3)             | 146 (26.6)            | 53 (34.0)             | 24 (19.4)              |                  |
| Age 65-74                                   | 1962 (30.8)         | 237 (32.6)            | 985 (31.6)             | 530 (31.2)             | 152 (27.7)            | 36 (23.1)             | 22 (17.7)              |                  |
| Age 75-84                                   | 1528 (24.0)         | 168 (23.1)            | 721 (23.1)             | 419 (24.7)             | 147 (26.8)            | 35 (22.4)             | 38 (30.6)              |                  |
| Age ≥85                                     | 587 (9.2)           | 60 (8.3)              | 264 (8.5)              | 159 (9.4)              | 58 (10.6)             | 20 (12.8)             | 26 (21.0)              |                  |
| <b>Vital signs</b>                          |                     |                       |                        |                        |                       |                       |                        |                  |
| Systolic blood pressure category, mmHg      |                     |                       |                        |                        |                       |                       |                        | 0.07             |
| <120                                        | 2210 (34.7)         | 265 (36.5)            | 1069 (34.3)            | 592 (34.9)             | 201 (36.7)            | 53 (34.0)             | 30 (24.2)              |                  |
| 120-129                                     | 1335 (21.0)         | 137 (18.9)            | 674 (21.6)             | 361 (21.3)             | 110 (20.1)            | 26 (16.7)             | 27 (21.8)              |                  |
| 130-139                                     | 1656 (26.0)         | 198 (27.3)            | 831 (26.6)             | 416 (24.5)             | 120 (21.9)            | 49 (31.4)             | 42 (33.9)              |                  |
| 140-159                                     | 765 (12.0)          | 77 (10.6)             | 348 (11.2)             | 219 (12.9)             | 86 (15.7)             | 18 (11.5)             | 17 (13.7)              |                  |
| 160-179                                     | 159 (2.5)           | 20 (2.8)              | 77 (2.5)               | 35 (2.1)               | 19 (3.5)              | 4 (2.6)               | 4 (3.2)                |                  |
| ≥180                                        | 50 (0.8)            | 7 (1.0)               | 25 (0.8)               | 15 (0.9)               | 2 (0.4)               | 0 (0.0)               | 1 (0.8)                |                  |
| Unknown                                     | 197 (3.1)           | 22 (3.0)              | 96 (3.1)               | 60 (3.5)               | 10 (1.8)              | 6 (3.8)               | 3 (2.4)                |                  |
| Diastolic blood pressure category, mmHg     |                     |                       |                        |                        |                       |                       |                        | 0.78             |
| <80                                         | 4730 (74.2)         | 566 (78.0)            | 2277 (73.0)            | 1255 (73.9)            | 416 (75.9)            | 117 (75.0)            | 99 (79.8)              |                  |
| 81-84                                       | 564 (8.9)           | 58 (8.0)              | 287 (9.2)              | 158 (9.3)              | 45 (8.2)              | 10 (6.4)              | 6 (4.8)                |                  |
| 85-89                                       | 511 (8.0)           | 44 (6.1)              | 270 (8.7)              | 132 (7.8)              | 39 (7.1)              | 15 (9.6)              | 11 (8.9)               |                  |
| 90-99                                       | 275 (4.3)           | 27 (3.7)              | 144 (4.6)              | 67 (3.9)               | 28 (5.1)              | 6 (3.8)               | 3 (2.4)                |                  |
| 100-109                                     | 68 (1.1)            | 7 (1.0)               | 32 (1.0)               | 19 (1.1)               | 6 (1.1)               | 2 (1.3)               | 2 (1.6)                |                  |
| ≥110                                        | 26 (0.4)            | 2 (0.3)               | 14 (0.4)               | 7 (0.4)                | 3 (0.5)               | 0 (0.0)               | 0 (0.0)                |                  |
| Unknown                                     | 198 (3.1)           | 22 (3.0)              | 96 (3.1)               | 60 (3.5)               | 11 (2.0)              | 6 (3.8)               | 3 (2.4)                |                  |
| Body mass index category, kg/m <sup>2</sup> |                     |                       |                        |                        |                       |                       |                        | <b>&lt;0.001</b> |
| <18.5                                       | 109 (1.7)           | 20 (2.8)              | 59 (1.9)               | 17 (1.0)               | 9 (1.6)               | 2 (1.3)               | 2 (1.6)                |                  |
| 18.5-24.9                                   | 1751 (27.5)         | 252 (34.7)            | 870 (27.9)             | 433 (25.5)             | 129 (23.5)            | 35 (22.4)             | 32 (25.8)              |                  |
| 25.0-29.9                                   | 2211 (34.7)         | 240 (33.1)            | 1072 (34.4)            | 614 (36.2)             | 196 (35.8)            | 47 (30.1)             | 42 (33.9)              |                  |
| 30.0-39.9                                   | 1754 (27.5)         | 156 (21.5)            | 855 (27.4)             | 488 (28.7)             | 166 (30.3)            | 52 (33.3)             | 37 (29.8)              |                  |
| ≥40                                         | 196 (3.1)           | 21 (2.9)              | 94 (3.0)               | 52 (3.1)               | 18 (3.3)              | 8 (5.1)               | 3 (2.4)                |                  |
| Unknown                                     | 351 (5.5)           | 37 (5.1)              | 170 (5.4)              | 94 (5.5)               | 30 (5.5)              | 12 (7.7)              | 8 (6.5)                |                  |
| <b>Laboratory results</b>                   |                     |                       |                        |                        |                       |                       |                        |                  |
| Total cholesterol, mg/dL                    |                     |                       |                        |                        |                       |                       |                        | 0.26             |
| >240                                        | 232 (3.6)           | 37 (5.1)              | 104 (3.3)              | 64 (3.8)               | 17 (3.1)              | 6 (3.8)               | 4 (3.2)                |                  |
| 200-240                                     | 839 (13.2)          | 98 (13.5)             | 420 (13.5)             | 208 (12.2)             | 80 (14.6)             | 20 (12.8)             | 13 (10.5)              |                  |
| <200                                        | 3239 (50.8)         | 345 (47.5)            | 1580 (50.6)            | 875 (51.5)             | 301 (54.9)            | 74 (47.4)             | 64 (51.6)              |                  |
| Unknown                                     | 2062 (32.4)         | 246 (33.9)            | 1016 (32.6)            | 551 (32.4)             | 150 (27.4)            | 56 (35.9)             | 43 (34.7)              |                  |
| Low density lipoprotein, mg/dL              |                     |                       |                        |                        |                       |                       |                        | 0.24             |

|         |             |            |            |            |            |           |           |
|---------|-------------|------------|------------|------------|------------|-----------|-----------|
| ≥200    | 28 (0.4)    | 5 (0.7)    | 9 (0.3)    | 9 (0.5)    | 2 (0.4)    | 1 (0.6)   | 2 (1.6)   |
| 160-199 | 171 (2.7)   | 25 (3.4)   | 80 (2.6)   | 51 (3.0)   | 12 (2.2)   | 1 (0.6)   | 2 (1.6)   |
| 130-159 | 569 (8.9)   | 67 (9.2)   | 273 (8.8)  | 156 (9.2)  | 47 (8.6)   | 15 (9.6)  | 11 (8.9)  |
| 100-129 | 1286 (20.2) | 142 (19.6) | 655 (21.0) | 316 (18.6) | 115 (21.0) | 40 (25.6) | 18 (14.5) |
| 70-99   | 1670 (26.2) | 183 (25.2) | 810 (26.0) | 439 (25.9) | 158 (28.8) | 39 (25.0) | 41 (33.1) |
| <70     | 808 (12.7)  | 85 (11.7)  | 390 (12.5) | 234 (13.8) | 75 (13.7)  | 12 (7.7)  | 12 (9.7)  |
| Unknown | 1840 (28.9) | 219 (30.2) | 903 (28.9) | 493 (29.0) | 139 (25.4) | 48 (30.8) | 38 (30.6) |

**eFigure 2. Cumulative Incidence of Aortic Dissection, All-Cause Mortality, and Elective Aortic Surgery, by Initial TAA size**

**A. Aortic Dissection**

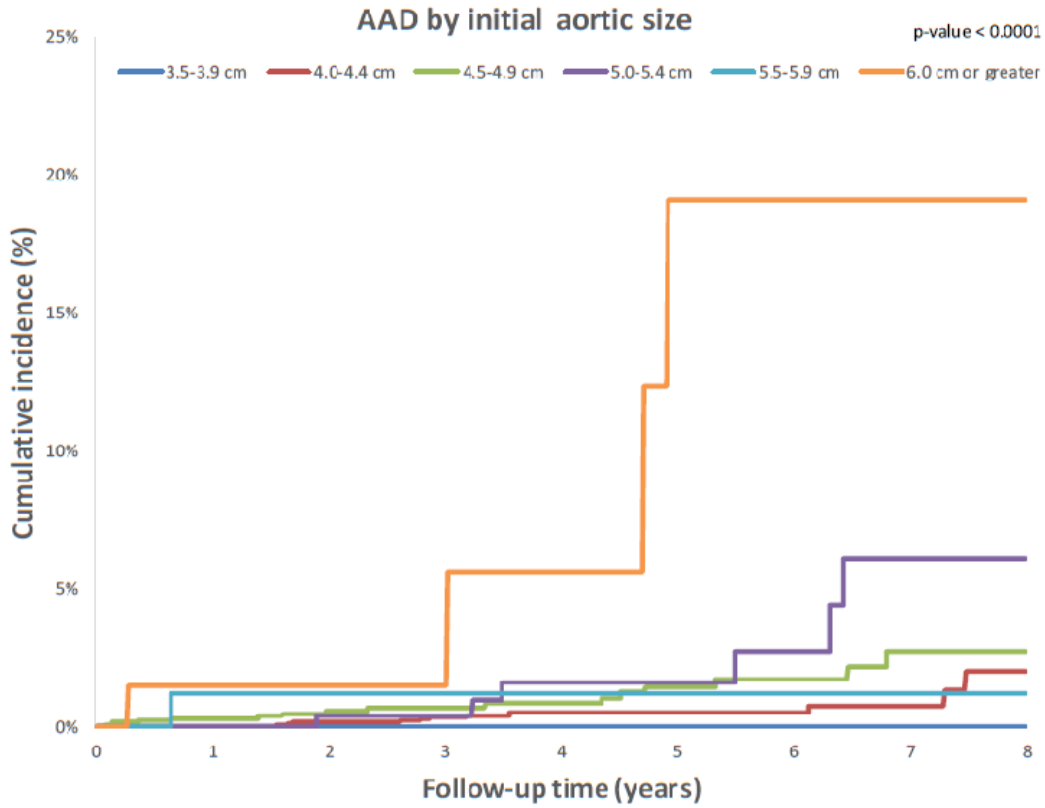

| Patients at risk  |      |      |      |      |     |     |     |     |    |
|-------------------|------|------|------|------|-----|-----|-----|-----|----|
|                   | 0    | 1    | 2    | 3    | 4   | 5   | 6   | 7   | 8  |
| 3.5-3.9 cm        | 726  | 630  | 503  | 400  | 304 | 219 | 155 | 76  | 43 |
| 4.0-4.4 cm        | 3120 | 2604 | 1954 | 1416 | 990 | 681 | 454 | 222 | 96 |
| 4.5-4.9 cm        | 1698 | 1312 | 996  | 782  | 566 | 400 | 285 | 164 | 95 |
| 5.0-5.4 cm        | 548  | 323  | 239  | 186  | 136 | 104 | 70  | 40  | 26 |
| 5.5-5.9 cm        | 156  | 76   | 54   | 40   | 31  | 25  | 22  | 12  | 7  |
| 6.0 cm or greater | 124  | 45   | 33   | 24   | 16  | 12  | 8   | 4   | 1  |

Follow-up censored at end of study, disenrollment, death, or aortic surgery

B. All-Cause Mortality

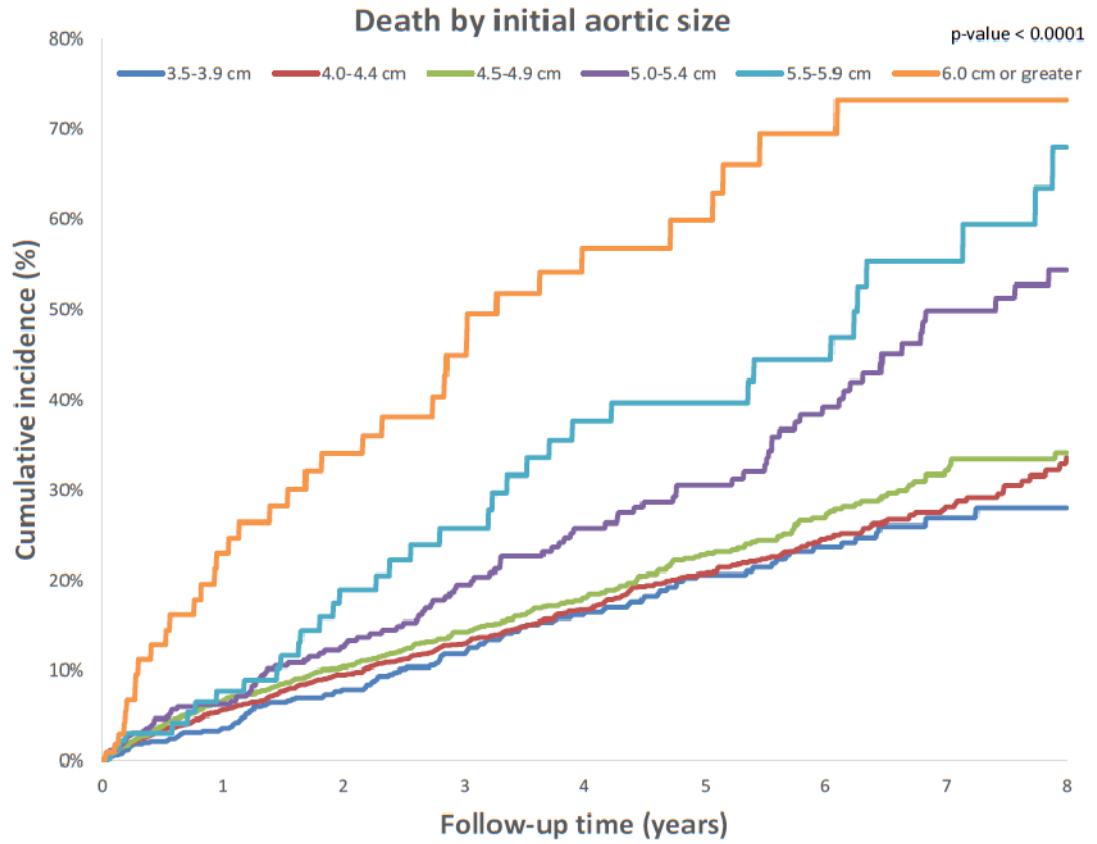

| Patients at risk  |      |      |      |      |     |     |     |     |    |
|-------------------|------|------|------|------|-----|-----|-----|-----|----|
|                   | 0    | 1    | 2    | 3    | 4   | 5   | 6   | 7   | 8  |
| 3.5-3.9 cm        | 726  | 630  | 503  | 400  | 304 | 219 | 155 | 76  | 43 |
| 4.0-4.4 cm        | 3120 | 2605 | 1956 | 1418 | 992 | 683 | 455 | 223 | 96 |
| 4.5-4.9 cm        | 1698 | 1314 | 998  | 767  | 567 | 401 | 286 | 165 | 96 |
| 5.0-5.4 cm        | 548  | 323  | 239  | 186  | 136 | 104 | 70  | 40  | 26 |
| 5.5-5.9 cm        | 156  | 76   | 54   | 40   | 31  | 25  | 22  | 12  | 7  |
| 6.0 cm or greater | 124  | 45   | 33   | 24   | 16  | 13  | 9   | 5   | 2  |

Follow-up censored at end of study, disenrollment, or aortic surgery



C. Receipt of Elective Aortic Surgery

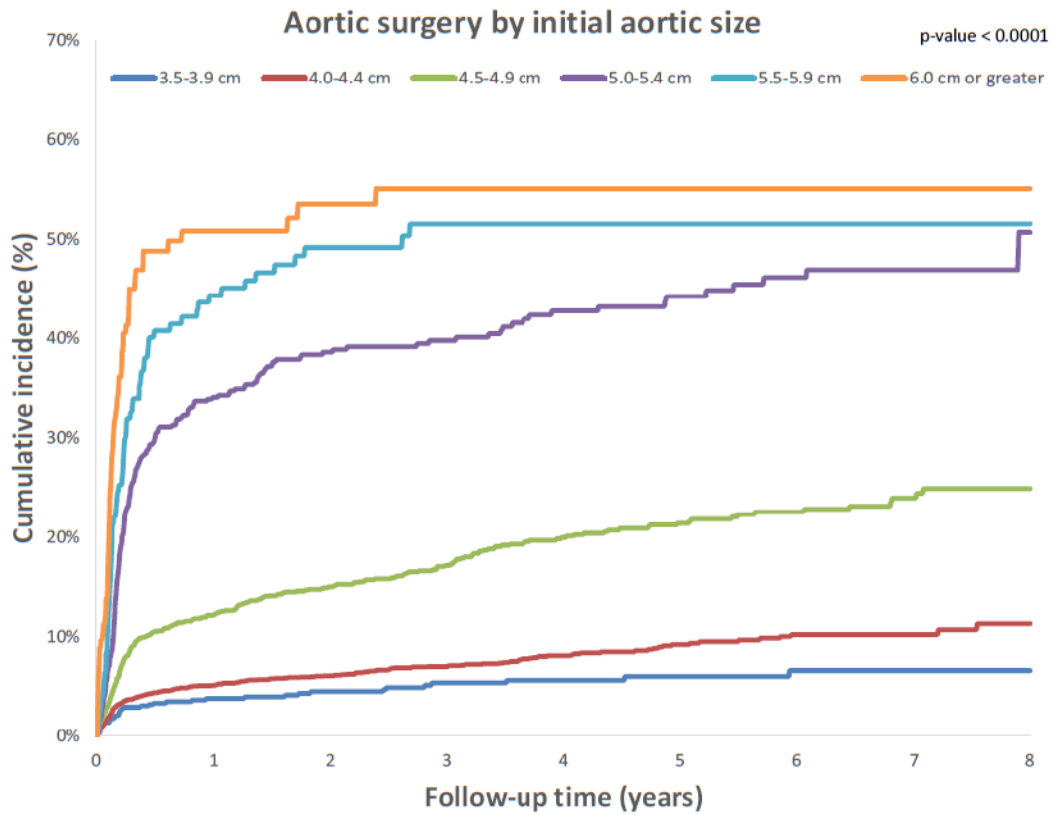

Patients at risk

|                   |      |      |      |      |     |     |     |     |    |
|-------------------|------|------|------|------|-----|-----|-----|-----|----|
| 3.5-3.9 cm        | 726  | 630  | 503  | 400  | 304 | 219 | 155 | 76  | 43 |
| 4.0-4.4 cm        | 3120 | 2604 | 1954 | 1416 | 990 | 681 | 454 | 222 | 96 |
| 4.5-4.9 cm        | 1698 | 1312 | 996  | 766  | 566 | 400 | 285 | 164 | 95 |
| 5.0-5.4 cm        | 548  | 323  | 239  | 186  | 136 | 104 | 70  | 40  | 26 |
| 5.5-5.9 cm        | 156  | 76   | 54   | 40   | 31  | 25  | 22  | 12  | 7  |
| 6.0 cm or greater | 124  | 45   | 33   | 24   | 16  | 12  | 8   | 4   | 1  |

Follow-up censored at end of study, disenrollment, death, or aortic dissection/rupture

**eTable 3. Surgery among bicuspid aortic valve patients**

| Initial aortic size, cm | Total, N | BAV, N | BAV (%) | Total aortic surgeries, N (%) | Aortic surgeries in BAV patients, N (%) | % of Total surgeries accounted for by BAV patients |
|-------------------------|----------|--------|---------|-------------------------------|-----------------------------------------|----------------------------------------------------|
| 3.5-3.9                 | 726      | 56     | 7.7     | 38 (5.2)                      | 15 (26.8)                               | 39.4                                               |
| 4.0-4.4                 | 3120     | 269    | 8.6     | 237 (7.6)                     | 83 (30.9)                               | 35                                                 |
| 4.5-4.9                 | 1698     | 266    | 15.7    | 313 (18.4)                    | 132 (49.6)                              | 42.2                                               |
| 5.0-5.4                 | 548      | 119    | 21.7    | 225 (41.1)                    | 80 (67.2)                               | 35.6                                               |
| 5.5-5.9                 | 156      | 24     | 15.4    | 78 (50.0)                     | 17 (70.8)                               | 21.8                                               |
| ≥ 6.0                   | 124      | 13     | 10.5    | 64 (51.6)                     | 11 (84.6)                               | 17.2                                               |

**eTable 4. Model Discrimination Parameters (C-statistics) for Models Using Aortic Size vs Aortic Size Index**

| Model and Outcome             | Aortic size            | ASI                    |
|-------------------------------|------------------------|------------------------|
| Baseline model - AD           | 0.8521 (0.7922-0.9120) | 0.8596 (0.8021-0.9171) |
| Baseline model - AD/death     | 0.8215 (0.8053-0.8377) | 0.8228 (0.8061-0.8396) |
|                               |                        |                        |
| Time-varying model - AD       | 0.8538 (0.7973-0.9104) | 0.8748 (0.8209-0.9287) |
| Time-varying model - AD/death | 0.8213 (0.8052-0.8374) | 0.8203 (0.8035-0.8372) |

ASI = aortic size index; AD = aortic dissection

Note: For the ASI models, we used the categories <2.00, 2.00-2.74, 2.75-3.49, >=3.50 in our analyses as there were only 17 patients in the 4.25-4.99 and >= 5.00 categories, none of whom had an aortic dissection.

**eTable 5. Multivariable Association of Initial Aortic Size Index (ASI) and Most Recent ASI Prior to Outcome with Clinical Outcomes**

| Aortic Dissection <sup>a</sup>                    |                            |                  |  |                                           |                  |
|---------------------------------------------------|----------------------------|------------------|--|-------------------------------------------|------------------|
|                                                   | Initial ASI Models         |                  |  | Time Updated Models Using Most Recent ASI |                  |
| Aortic size index (cm/m <sup>2</sup> )            | Adjusted HR (95% CI)       | P                |  | Adjusted HR (95% CI)                      | P                |
| < 2.00                                            | (ref)                      |                  |  | (ref)                                     |                  |
| 2.00-2.74                                         | <b>4.10 (1.29-13.03)</b>   | <b>0.017</b>     |  | <b>5.40 (1.47-19.88)</b>                  | <b>0.011</b>     |
| 2.75-3.49                                         | <b>13.28 (3.12-56.49)</b>  | <b>&lt;0.001</b> |  | <b>47.44 (10.73-209.67)</b>               | <b>&lt;0.001</b> |
| ≥3.50                                             | <b>28.86 (3.79-219.85)</b> | <b>0.001</b>     |  | <b>101.72 (16.46-628.62)</b>              | <b>&lt;0.001</b> |
| Aortic Dissection or All-Cause Death <sup>b</sup> |                            |                  |  |                                           |                  |
|                                                   | Initial ASI Models         |                  |  | Time Updated Models Using Most Recent ASI |                  |
| Aortic size index (cm/m <sup>2</sup> )            | Adjusted HR (95% CI)       | P                |  | Adjusted HR (95% CI)                      | P                |
| < 2.00                                            | (ref)                      |                  |  | (ref)                                     |                  |
| 2.00-2.74                                         | <b>1.34 (1.11-1.62)</b>    | <b>0.002</b>     |  | <b>1.78 (1.46-2.17)</b>                   | <b>&lt;0.001</b> |
| 2.75-3.49                                         | <b>1.69 (1.29-2.20)</b>    | <b>&lt;0.001</b> |  | <b>2.51 (1.93-3.26)</b>                   | <b>&lt;0.001</b> |
| ≥3.50                                             | <b>3.95 (2.69-5.79)</b>    | <b>&lt;0.001</b> |  | <b>5.36 (3.75-7.67)</b>                   | <b>&lt;0.001</b> |

Abbreviations: ASI, aortic size index; HR, hazard ratio

a. Model adjusted for baseline variables of index age, gender, race, smoking status, BMI, heart rate, SBP, LDL, atrial flutter or fibrillation, peripheral artery disease, mitral or aortic valvular disease, heart failure, hypertension, dyslipidemia, diabetes mellitus, chronic lung disease, hypothyroidism, diagnosed depression, abdominal aortic aneurysm, and bicuspid aortic valve

b. Model adjusted for baseline variables of index age, gender, race, smoking status, BMI, heart rate, SBP, LDL, acute coronary syndrome, ischemic stroke, atrial flutter or fibrillation, peripheral artery disease, mitral or aortic valvular disease, heart failure, hypertension, dyslipidemia, diabetes mellitus, chronic liver disease, chronic lung disease, hypothyroidism, diagnosed depression, abdominal aortic aneurysm and bicuspid aortic valve

For the ASI models, we used the categories <2.00, 2.00-2.74, 2.75-3.49, ≥3.50 in our analyses as there were only 17 patients in the 4.25-4.99 and ≥ 5.00 categories, none of whom had an aortic dissection
