# Supplementary material
Source: PubMed Central journal article supplement (PMC9535537)
Supplement: jamacardiol-e223305-s002.pdf [file jamacardiol-e223305-s002.pdf]

\*Indicates required information. Only first name, last name, and suffix will appear in PubMed.

| <b>*Group Name(s): Kaiser Permanente Center for Thoracic Aortic Disease</b> |                   |                              |                  |                                       |                                          |                                                         |                                                                                            |
|-----------------------------------------------------------------------------|-------------------|------------------------------|------------------|---------------------------------------|------------------------------------------|---------------------------------------------------------|--------------------------------------------------------------------------------------------|
| <b>*First Name and Middle Initial(s)</b>                                    | <b>*Last Name</b> | <b>*Suffix (eg, Jr, III)</b> | Academic Degrees | Institution                           | Location (city, state/province, country) | Role or Contribution, eg, chair, principal investigator | Group (if more than 1 Group listed in the byline) and/or Subgroup (eg, Steering Committee) |
| Norma                                                                       | Chow              |                              | MS, LCGC         | Kaiser Permanente Northern California | San Francisco, CA                        | Genetic Counselor                                       |                                                                                            |
| Emily                                                                       | Chen              |                              | MD, PhD          | Kaiser Permanente Northern California | San Francisco, CA                        | Medical Genetics                                        |                                                                                            |
| Katharine                                                                   | Dawson            |                              | MD               | Kaiser Permanente Northern California | Oakland, CA                              | Medical Genetics                                        |                                                                                            |
| Leslie                                                                      | Manace            |                              | MD               | Kaiser Permanente Northern California | Oakland, CA                              | Medical Genetics                                        |                                                                                            |
| Thomas                                                                      | Urbania           |                              | MD               | Kaiser Permanente Northern California | Oakland, CA                              | Radiology                                               |                                                                                            |
| Scott                                                                       | Yang              |                              | MD, PhD          | Kaiser Permanente Northern California | Sacramento, CA                           | Cardiology                                              |                                                                                            |
| Mario                                                                       | Pompili           |                              | MD               | Kaiser Permanente Northern California | Santa Clara, CA                          | Cardiovascular Surgery                                  |                                                                                            |
| Brian                                                                       | Cain              |                              | MD               | Kaiser Permanente Northern California | San Francisco, CA                        | Cardiovascular Surgery                                  |                                                                                            |
| Osvaldo                                                                     | Yano              |                              | MD               | Kaiser Permanente Northern California | San Francisco, CA                        | Vascular Surgery                                        |                                                                                            |
| Hong                                                                        | Hua               |                              | MD               | Kaiser Permanente Northern California | San Francisco, CA                        | Vascular Surgery                                        |                                                                                            |
| Bian                                                                        | Wu                |                              | MD               | Kaiser Permanente Northern California | San Francisco, CA                        | Vascular Surgery                                        |                                                                                            |
| Guarav                                                                      | Sharma            |                              | MD               | Kaiser Permanente Northern California | Santa Clara, CA                          | Vascular Surgery                                        |                                                                                            |
| Aaron                                                                       | Baker             |                              | MD               | Kaiser Permanente Northern California | Santa Rosa, CA                           | Vascular Surgery                                        |                                                                                            |
| Nayan                                                                       | Sivamurthy        |                              | MD               | Kaiser Permanente Northern California | Santa Clara, CA                          | Vascular Surgery                                        |                                                                                            |

Supplemental Online Content: Nonauthor Collaborators

\*Indicates required information. Only first name, last name, and suffix will appear in PubMed.

| <b>*First Name and Middle Initial(s)</b> | <b>*Last Name</b> | <b>*Suffix (eg, Jr, III)</b> | Academic Degrees | Institution                           | Location (city, state/province, country) | Role or Contribution, eg, chair, principal investigator | Group (if more than 1 Group listed in the byline) and/or Subgroup (eg, Steering Committee) |
|------------------------------------------|-------------------|------------------------------|------------------|---------------------------------------|------------------------------------------|---------------------------------------------------------|--------------------------------------------------------------------------------------------|
| Joy                                      | Garg              |                              | MD               | Kaiser Permanente Northern California | Hayward, CA                              | Vascular Surgery                                        |                                                                                            |
| Thesalia                                 | Madriz            |                              | BA               | Kaiser Permanente Northern California | San Francisco, CA                        | Administrative                                          |                                                                                            |
| Honora                                   | Hui               |                              | BA               | Kaiser Permanente Northern California | San Francisco, CA                        | Administrative                                          |                                                                                            |
